# Supplementary material
Source: PubMed Central journal article supplement (PMC6025666)

| Author(s) and Year                                    | Outcome Type           | Indicator                                | Outcome [95% CI]      |
|-------------------------------------------------------|------------------------|------------------------------------------|-----------------------|
| <b>1_distribution</b>                                 |                        |                                          |                       |
| Secher (2012)                                         | 3_knowledge transfer   | Low back pain / physical activity        | -0.05 [-0.45, 0.36]   |
|                                                       | 3_knowledge transfer   | Low back pain / bed rest                 | 0.11 [-0.28, 0.50]    |
|                                                       | 3_knowledge transfer   | Recognising depression                   | 1.09 [0.71, 1.47]     |
|                                                       | 3_knowledge transfer   | Treatment of depressive patients         | 0.97 [0.60, 1.35]     |
|                                                       | 3_knowledge transfer   | Blood pressure measurement               | 0.26 [-0.15, 0.67]    |
|                                                       | 3_knowledge transfer   | Statins in primary prevention            | -0.41 [-1.02, 0.20]   |
|                                                       | 3_knowledge transfer   | Statins in secondary prevention          | -0.47 [-1.24, 0.30]   |
|                                                       | 3_knowledge transfer   | Myocardial infarct                       | -0.18 [-0.71, 0.35]   |
|                                                       | 3_knowledge transfer   | Use of statin                            | -0.37 [-0.91, 0.17]   |
|                                                       | Shah (2014)            | 5_patient level                          | Low back pain / X-ray |
| 2_prescription                                        |                        | Low back pain / imaging                  | -0.31 [-0.64, 0.01]   |
| <i>Random Effect Model for Distribution</i>           |                        |                                          | 0.09 [-0.23, 0.40]    |
| <b>2_educational meeting</b>                          |                        |                                          |                       |
| French (2013)                                         | 3_knowledge transfer   | Hypertension / At-goal BP                | 0.82 [0.28, 1.36]     |
|                                                       | 3_knowledge transfer   | Lifestyle counselling in hypertension    | 1.06 [0.56, 1.55]     |
|                                                       | 3_knowledge transfer   | Hypertensive medication adjustment       | 1.31 [0.81, 1.81]     |
|                                                       | 3_knowledge transfer   | Hypertensive medication adjustment       | 1.07 [-1.21, 3.34]    |
| Kiessling (2011)                                      | 5_patient level        | Hypertensive medication adjustment       | 0.96 [-0.06, 1.99]    |
| Mallen (2017)                                         | 5_patient level        | Disease Prevention Score                 | 0.18 [-0.05, 0.41]    |
| Soler (2010)                                          | 1_diagnostic behaviour | Hypertension / concurrent drugs          | 0.44 [0.37, 0.50]     |
|                                                       | 1_diagnostic behaviour | Hypertension / diuretics                 | 0.10 [0.01, 0.19]     |
|                                                       | 1_diagnostic behaviour | Coronary heart disease / beta-blockers   | -0.01 [-0.13, 0.11]   |
|                                                       | 1_diagnostic behaviour | Diabetes / agents acting                 | -0.08 [-0.13, -0.02]  |
| Verbiest (2014)                                       | 4_counselling          | Eye examination                          | 0.34 [0.16, 0.51]     |
| Vidal-Pardo (2013)                                    | 1_diagnostic behaviour | COPD classification                      | -0.02 [-0.12, 0.07]   |
|                                                       | 1_diagnostic behaviour | Forced spirometry                        | 0.01 [-0.03, 0.06]    |
|                                                       | 1_diagnostic behaviour | Blood gases                              | -0.03 [-0.19, 0.13]   |
|                                                       | 1_diagnostic behaviour | Chest X-rays                             | 0.03 [-0.03, 0.08]    |
|                                                       | 1_diagnostic behaviour | Glycated haemoglobin measurement         | -0.07 [-0.26, 0.11]   |
|                                                       | 1_diagnostic behaviour | BP measurement                           | 0.18 [0.11, 0.24]     |
|                                                       | 1_diagnostic behaviour | Monitoring for blood pressure            | -0.07 [-0.22, 0.09]   |
|                                                       | 1_diagnostic behaviour | LDL measurement                          | 0.10 [-0.03, 0.23]    |
|                                                       | 1_diagnostic behaviour | Monitoring for high cholesterol          | 0.11 [-0.02, 0.24]    |
|                                                       | 1_diagnostic behaviour | Recommendation of physical exercise      | 0.08 [-0.16, 0.31]    |
| <i>Random Effect Model for Educational Meeting</i>    |                        |                                          | 0.18 [0.06, 0.31]     |
| <b>3_diverse single methods</b>                       |                        |                                          |                       |
| Arts (2017)                                           | 2_prescription         | Micro-albuminuria measurement            | -0.08 [-0.31, 0.15]   |
| Dormuth (2012)                                        | 2_prescription         | Cardiovascular death                     | 0.42 [0.34, 0.50]     |
|                                                       | 2_prescription         | Diagnosis of a cardiac arrest            | 0.23 [0.14, 0.32]     |
| Ennis (2015)                                          | 1_diagnostic behaviour | First action to take                     | 0.57 [0.49, 0.65]     |
|                                                       | 1_diagnostic behaviour | Compression depth                        | 0.56 [0.50, 0.62]     |
|                                                       | 1_diagnostic behaviour | Compression frequency                    | 0.54 [0.49, 0.59]     |
|                                                       | 1_diagnostic behaviour | Compression ventilation ratio            | 0.59 [0.52, 0.66]     |
|                                                       | 1_diagnostic behaviour | Volume for ventilation                   | 0.63 [0.57, 0.68]     |
|                                                       | 1_diagnostic behaviour | Recovery position                        | 0.64 [0.58, 0.70]     |
|                                                       | 1_diagnostic behaviour | External defibrillator use               | 0.62 [0.57, 0.67]     |
|                                                       | 1_diagnostic behaviour | External defibrillator pads              | 0.26 [0.19, 0.33]     |
|                                                       | 1_diagnostic behaviour | Apply of eGFR                            | 0.57 [0.52, 0.63]     |
|                                                       | 1_diagnostic behaviour | Apply of PTH                             | 0.52 [0.46, 0.58]     |
| <i>Random Effect Model for diverse single methods</i> |                        |                                          | 0.48 [0.38, 0.58]     |
| <b>4_educational meeting+audit/feedback</b>           |                        |                                          |                       |
| Bonds (2009)                                          | 5_patient level        | Apply of Calcium                         | -0.05 [-0.31, 0.20]   |
|                                                       | 4_counselling          | Apply of Phosphorus                      | 0.15 [-0.18, 0.48]    |
|                                                       | 2_prescription         | Apply of CO2                             | 0.25 [-0.15, 0.65]    |
|                                                       | 2_prescription         | Apply of Hemoglobin                      | 0.12 [-0.62, 0.85]    |
|                                                       | 2_prescription         | Apply of TSAT                            | 0.09 [-0.77, 0.95]    |
| Peters-Klimm (2009)                                   | 5_patient level        | Diastolic blood pressure                 | -0.35 [-0.95, 0.24]   |
| Sipilä (2011)                                         | 2_prescription         | Micro-albuminuria measurement in elderly | -0.01 [-0.09, 0.08]   |
|                                                       | 2_prescription         | Foot examination                         | 0.02 [-0.06, 0.10]    |
|                                                       | 2_prescription         | Antidepressant                           | 0.07 [-0.02, 0.16]    |
|                                                       | 2_prescription         | Referral to mental healthcare            | -0.07 [-0.24, 0.10]   |
| Valles-Fernandez (2012)                               | 1_diagnostic behaviour | Apply of 25-D                            | 0.23 [0.19, 0.28]     |
|                                                       | 5_patient level        | Physical Functioning                     | 0.36 [0.32, 0.41]     |
|                                                       | 5_patient level        | Systolic blood pressure                  | 0.21 [0.17, 0.25]     |
| <i>Random Effect Model for Educ. Meeting + Audit</i>  |                        |                                          | 0.11 [0.02, 0.21]     |
| <b>5_diverse double methods</b>                       |                        |                                          |                       |
| Aaakhus (2016)                                        | 3_knowledge transfer   | Adherence Score                          | 0.48 [-0.18, 1.14]    |
| Franx (2014)                                          | 2_prescription         | AF treatment                             | 0.43 [0.18, 0.67]     |
|                                                       | 1_diagnostic behaviour | BMI assessed                             | -0.01 [-0.11, 0.09]   |
| Grunfeld (2013)                                       | 1_diagnostic behaviour | Pain intensity                           | 0.32 [-0.08, 0.71]    |
| Romera (2013)                                         | 1_diagnostic behaviour | Apply of LDL-C                           | 0.39 [0.02, 0.75]     |
|                                                       | 2_prescription         | Apply of Urine panel                     | 0.31 [-0.03, 0.66]    |
| <i>Random Effect Model for diverse double methods</i> |                        |                                          | 0.27 [0.07, 0.46]     |
| <b>6_multifaceted (+2 methods)</b>                    |                        |                                          |                       |
| Harris (2015)                                         | 1_diagnostic behaviour | Waist assessed                           | 0.11 [0.05, 0.17]     |
|                                                       | 1_diagnostic behaviour | Blood Pressure assessed                  | 0.09 [-0.06, 0.25]    |
|                                                       | 1_diagnostic behaviour | Alcohol use assessed                     | -0.02 [-0.04, 0.01]   |
|                                                       | 1_diagnostic behaviour | Smoking assessed                         | 0.21 [0.12, 0.30]     |
|                                                       | 1_diagnostic behaviour | Cholesterol assessed                     | 0.07 [0.05, 0.09]     |
|                                                       | 1_diagnostic behaviour | Blood glucose assessed                   | -0.06 [-0.09, -0.03]  |
|                                                       | 1_diagnostic behaviour | Framingham assessed                      | -0.05 [-0.15, 0.05]   |
|                                                       | 1_diagnostic behaviour | Smoking assessed                         | 0.26 [0.22, 0.30]     |
| Sinnema (2015)                                        | 1_diagnostic behaviour | Recognition of Anxiety/Depression        | 0.48 [0.24, 0.72]     |
| <i>Random Effect Model for multifaceted</i>           |                        |                                          | 0.11 [0.01, 0.20]     |
| <i>Random Effect Model for All Outcomes</i>           |                        |                                          | 0.22 [0.15, 0.29]     |

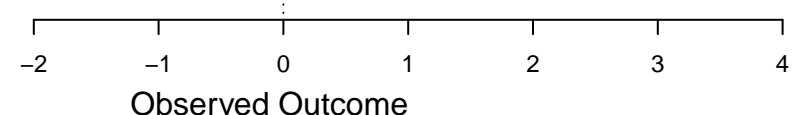

Supplement: 11606_2018_4435_MOESM3_ESM.pdf [file 11606_2018_4435_MOESM3_ESM.pdf]
