# Supplementary material
Source: PubMed Central journal article supplement (PMC6025666)

# Standard Error

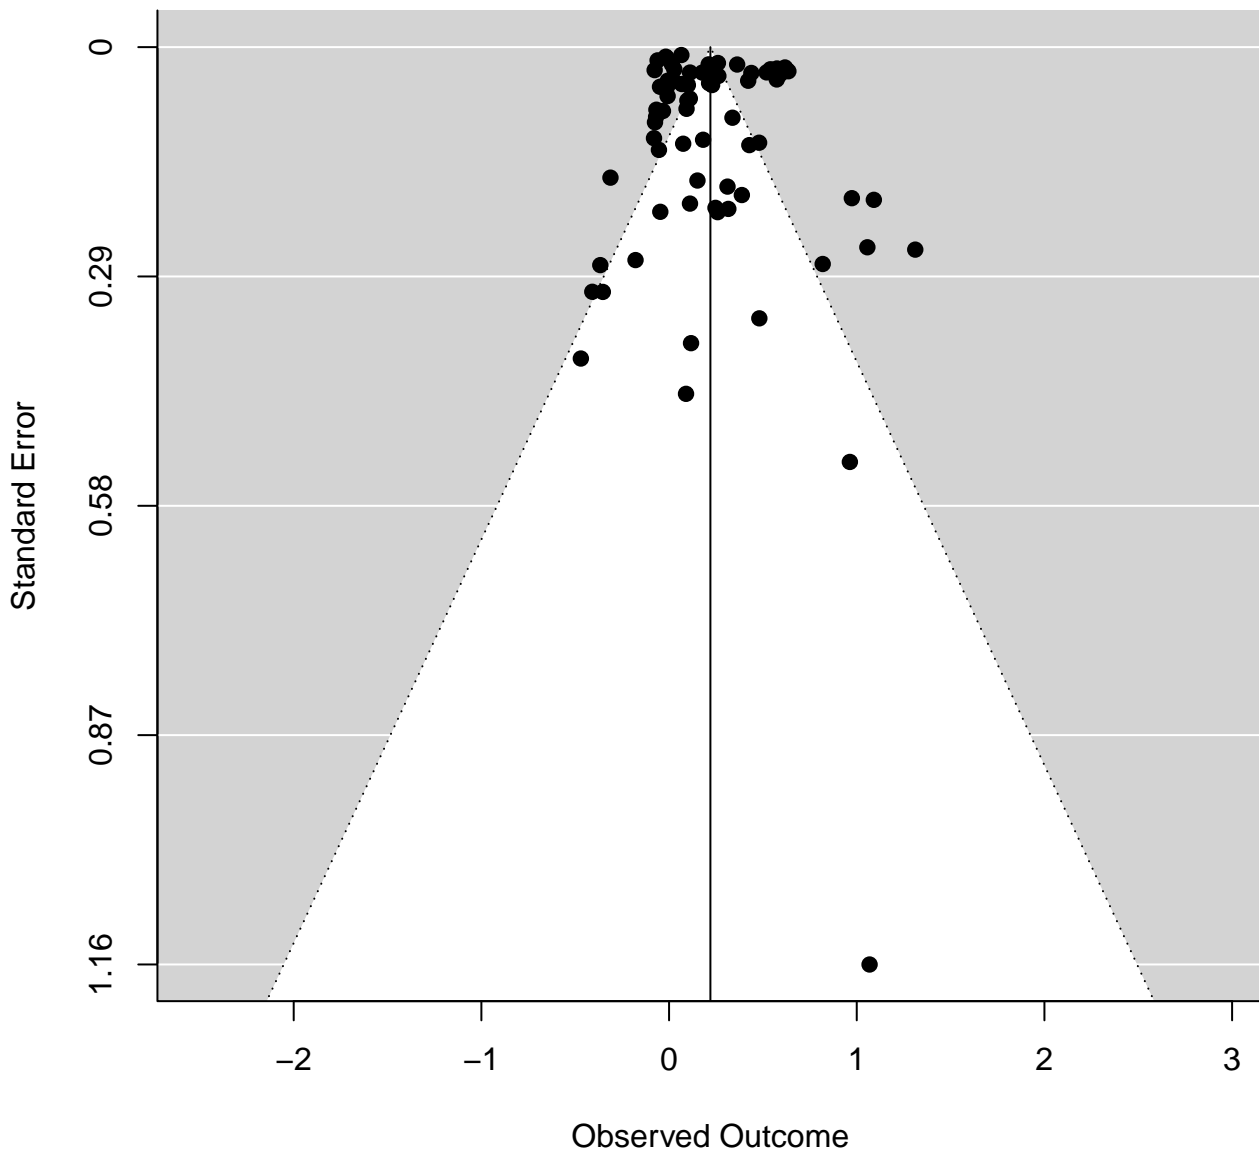

Supplement: 11606_2018_4435_MOESM2_ESM.pdf [file 11606_2018_4435_MOESM2_ESM.pdf]

# Single Methods

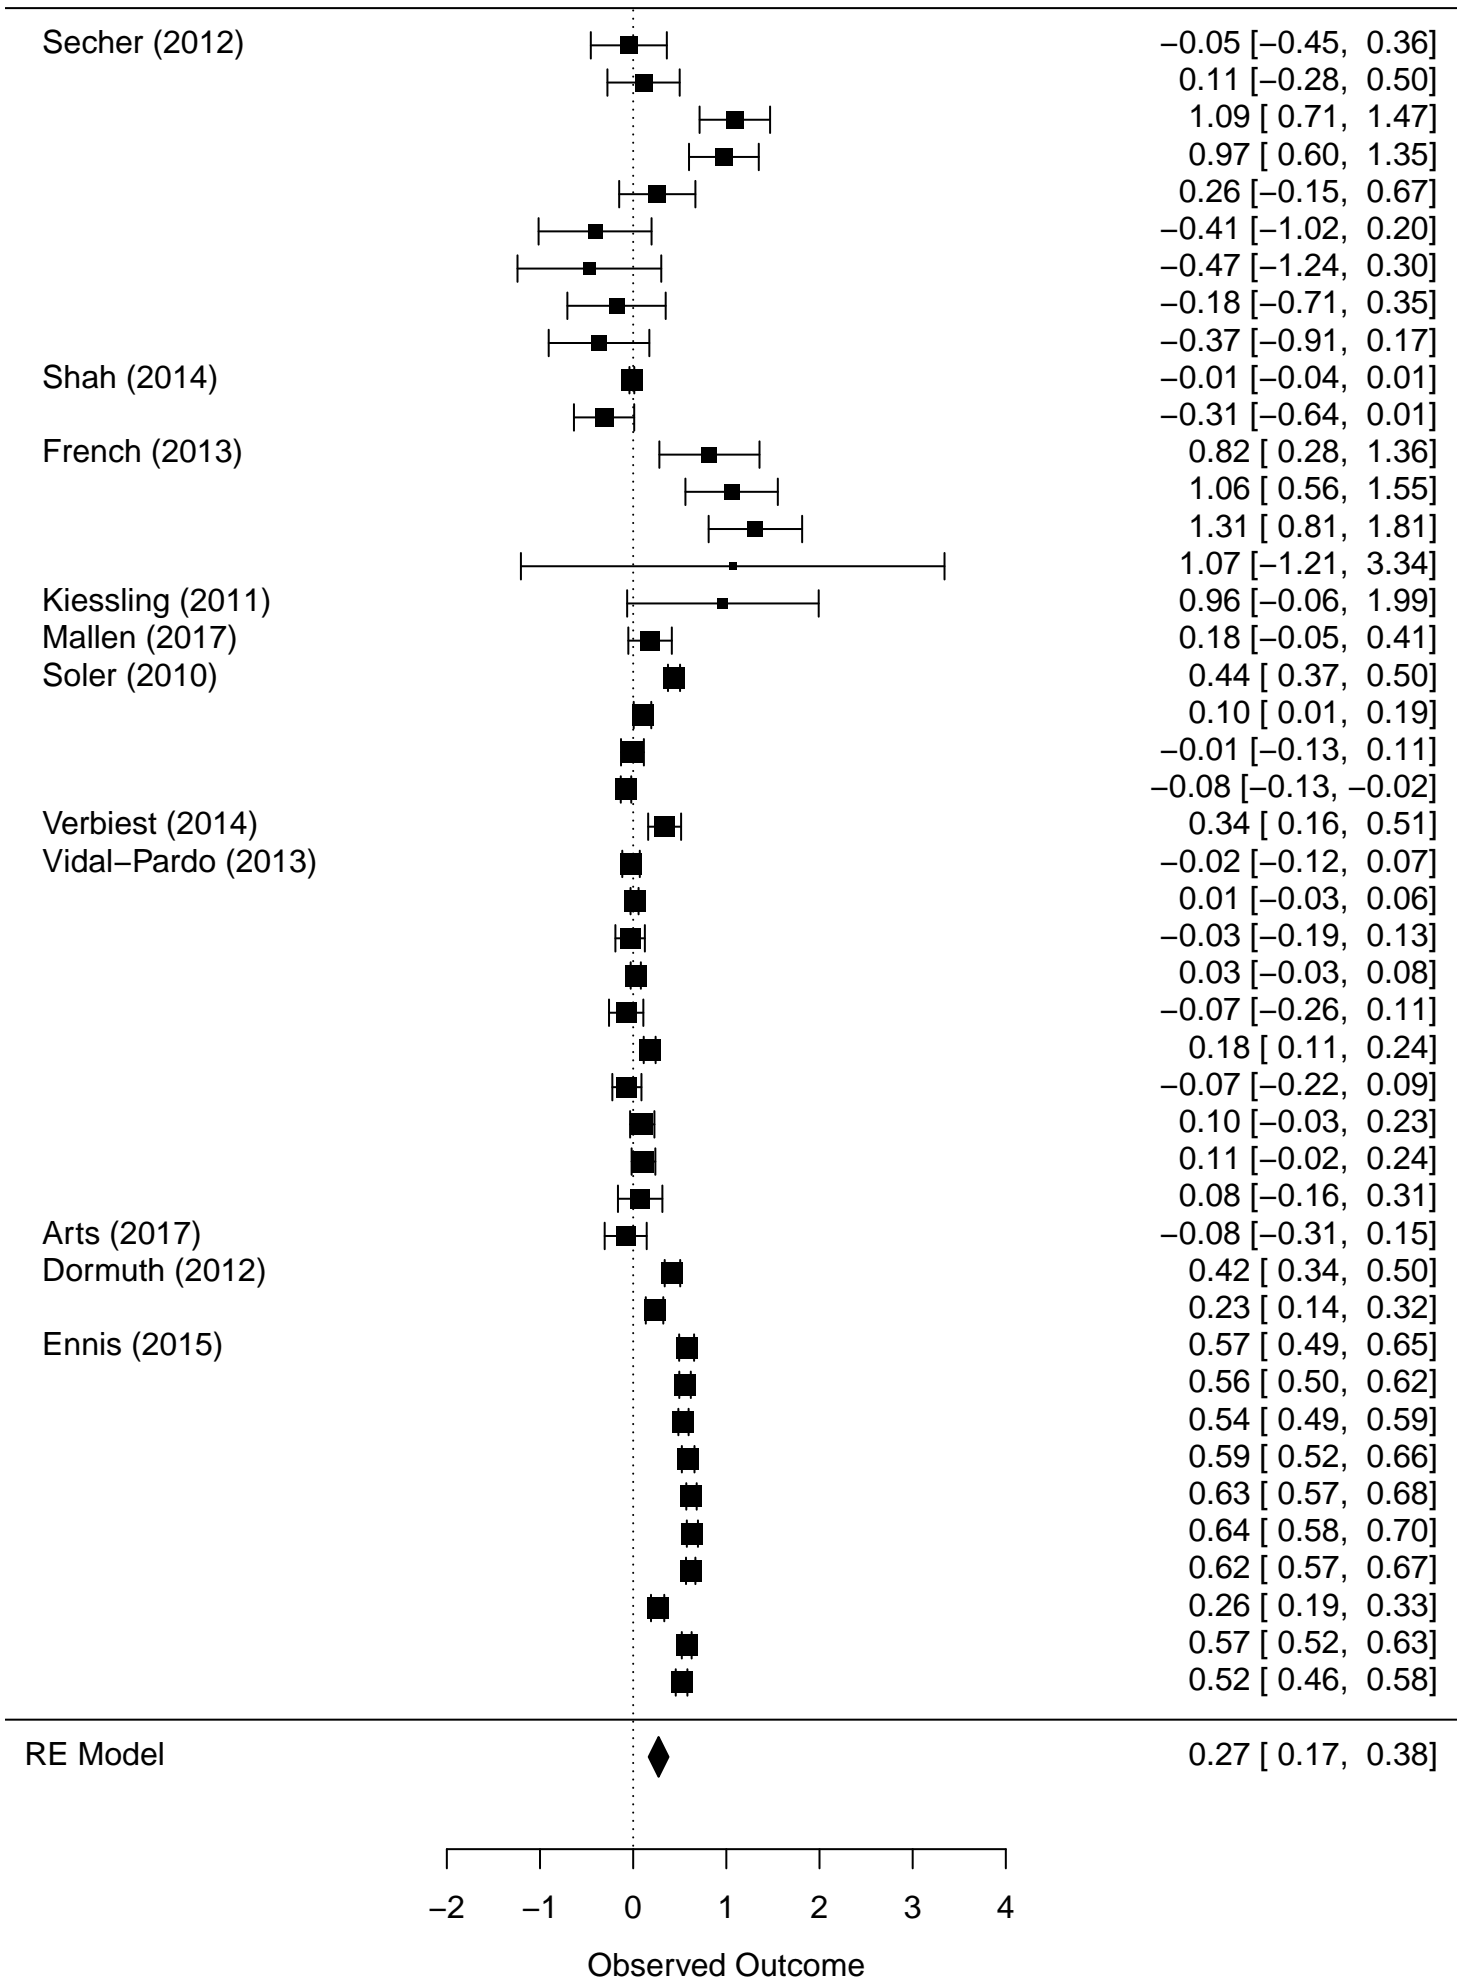

Supplement: 11606_2018_4435_MOESM4_ESM.pdf [file 11606_2018_4435_MOESM4_ESM.pdf]

# Multifaceted Methods

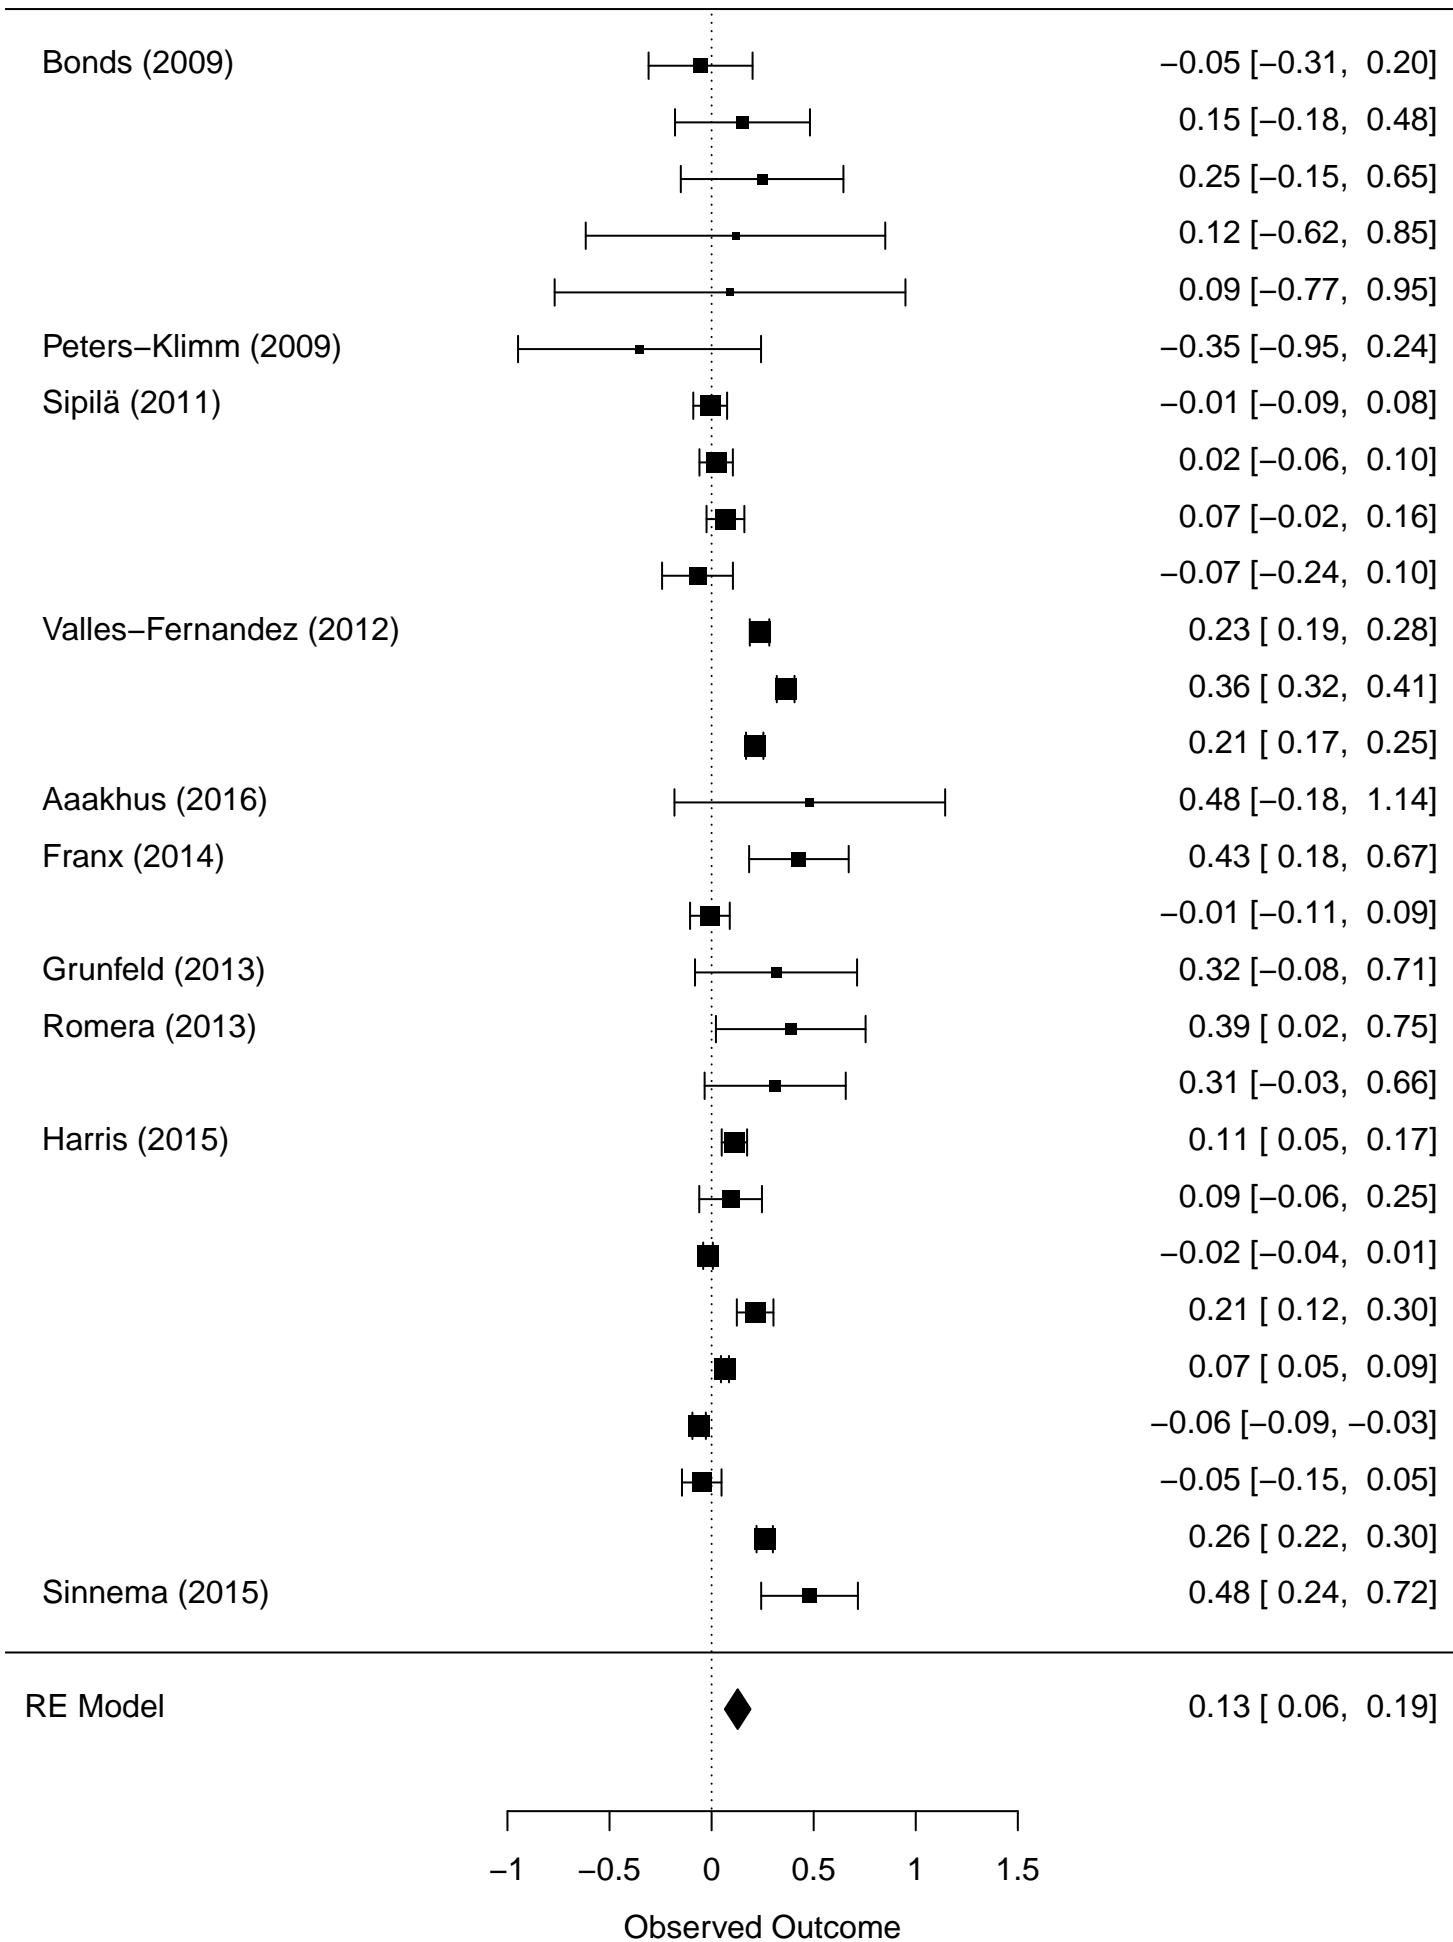

Supplement: 11606_2018_4435_MOESM5_ESM.pdf [file 11606_2018_4435_MOESM5_ESM.pdf]
